# Supplementary material for: The Impact of p53 on Aristolochic Acid I-Induced Gene Expression In Vivo
Source: MDPI journal article supplement (doi:10.3390/ijms20246155), 2019-12-06
Supplement: s1 [file s1]

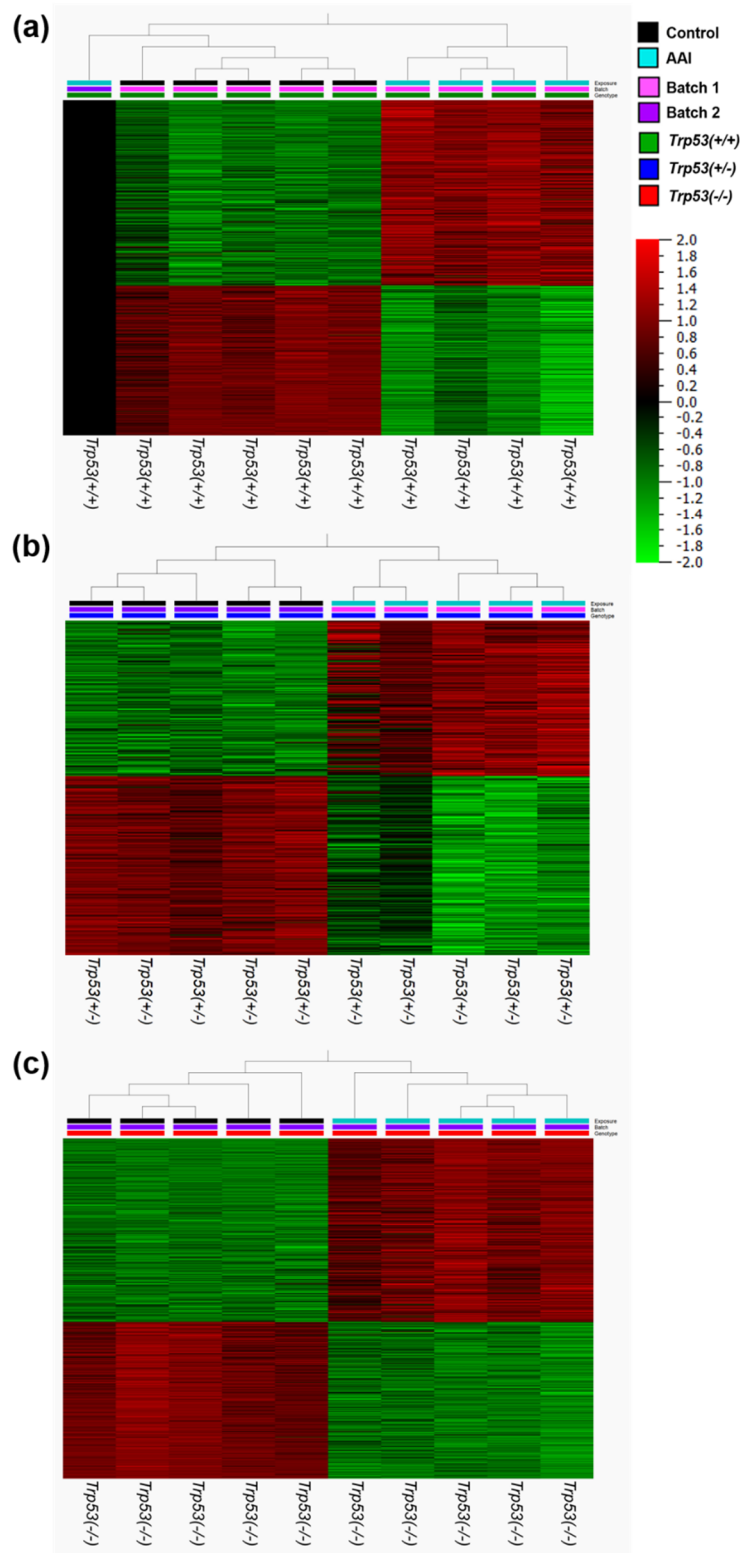

**Figure. S1** The impact of *Trp53* genotype on AAI-induced gene expression *in vivo*. Hierarchical clustering and heat map of significantly altered ( $p < 0.05$ ; fold change  $\pm 2$ ) genes for AAI-exposed (a) *Trp53*(+/+), (b) *Trp53*(+/-) and (c) *Trp53*(-/-) mouse kidneys. The heat map colours are based on gene expression (ordered in a decreasing manner for the AAI group), with red being up-regulated and green being down-regulated. Batches #1 and #2 indicate grouping of samples during cDNA synthesis.

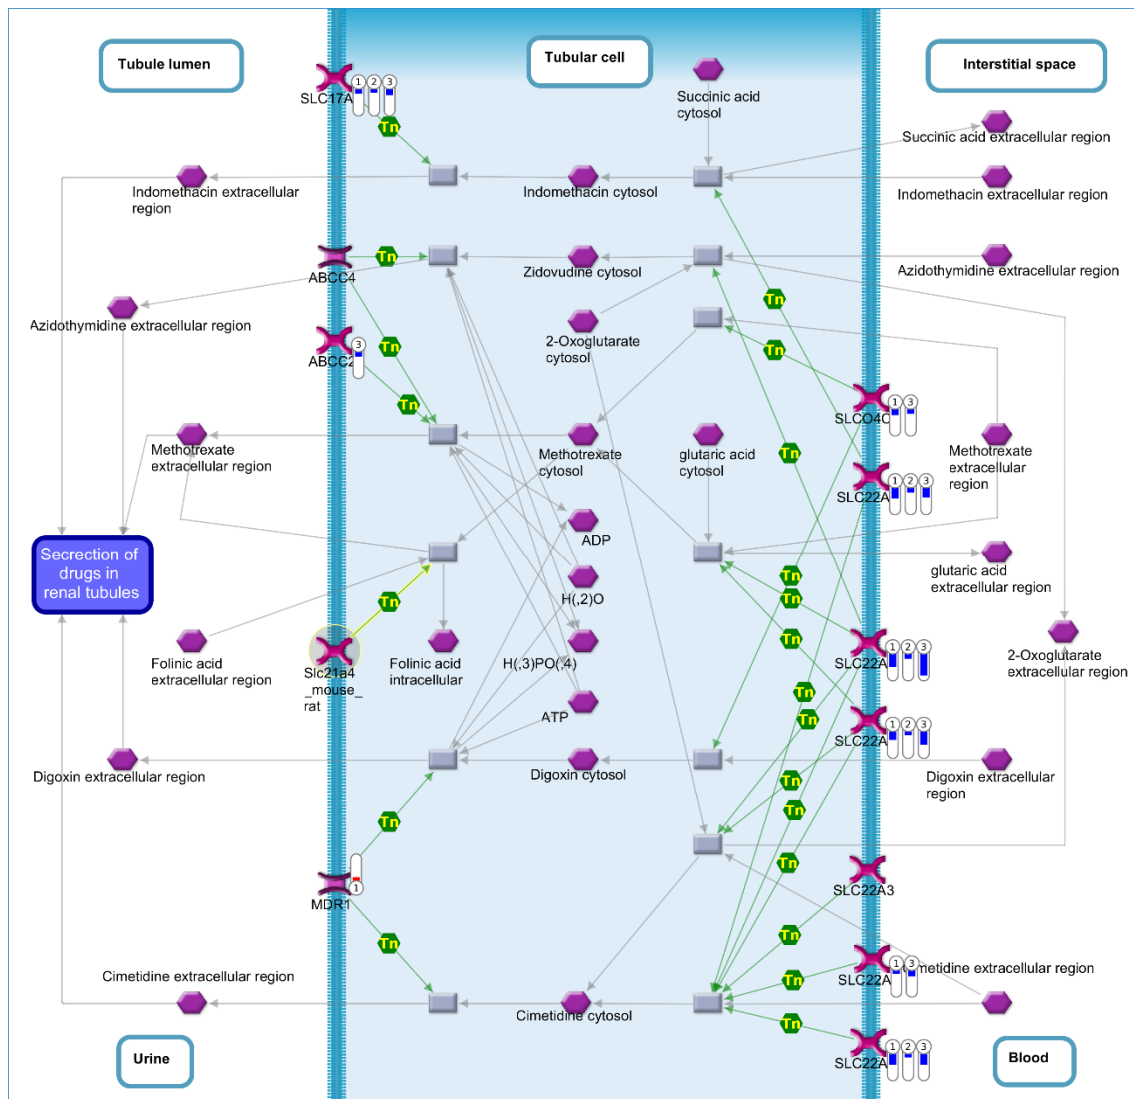

**Figure. S2** Map of renal secretion of drugs in rodents. Significantly altered ( $p < 0.05$ ; fold change  $\pm 2$ ) genes for AAI-exposed *Trp53*(+/+), *Trp53*(+/-) and *Trp53*(-/-) mouse kidneys were compared in MetaCore™. The enriched pathway (39<sup>th</sup> out of top 50;  $p < 0.05$ ) shows up-regulated (thermometer-like symbols in red) and down-regulated (thermometer-like symbols in blue) genes. Numbers indicate genotype: 1) *Trp53*(+/+), 2) *Trp53*(+/-) and 3) *Trp53*(-/-). For detailed legend see **Figure. S22**.

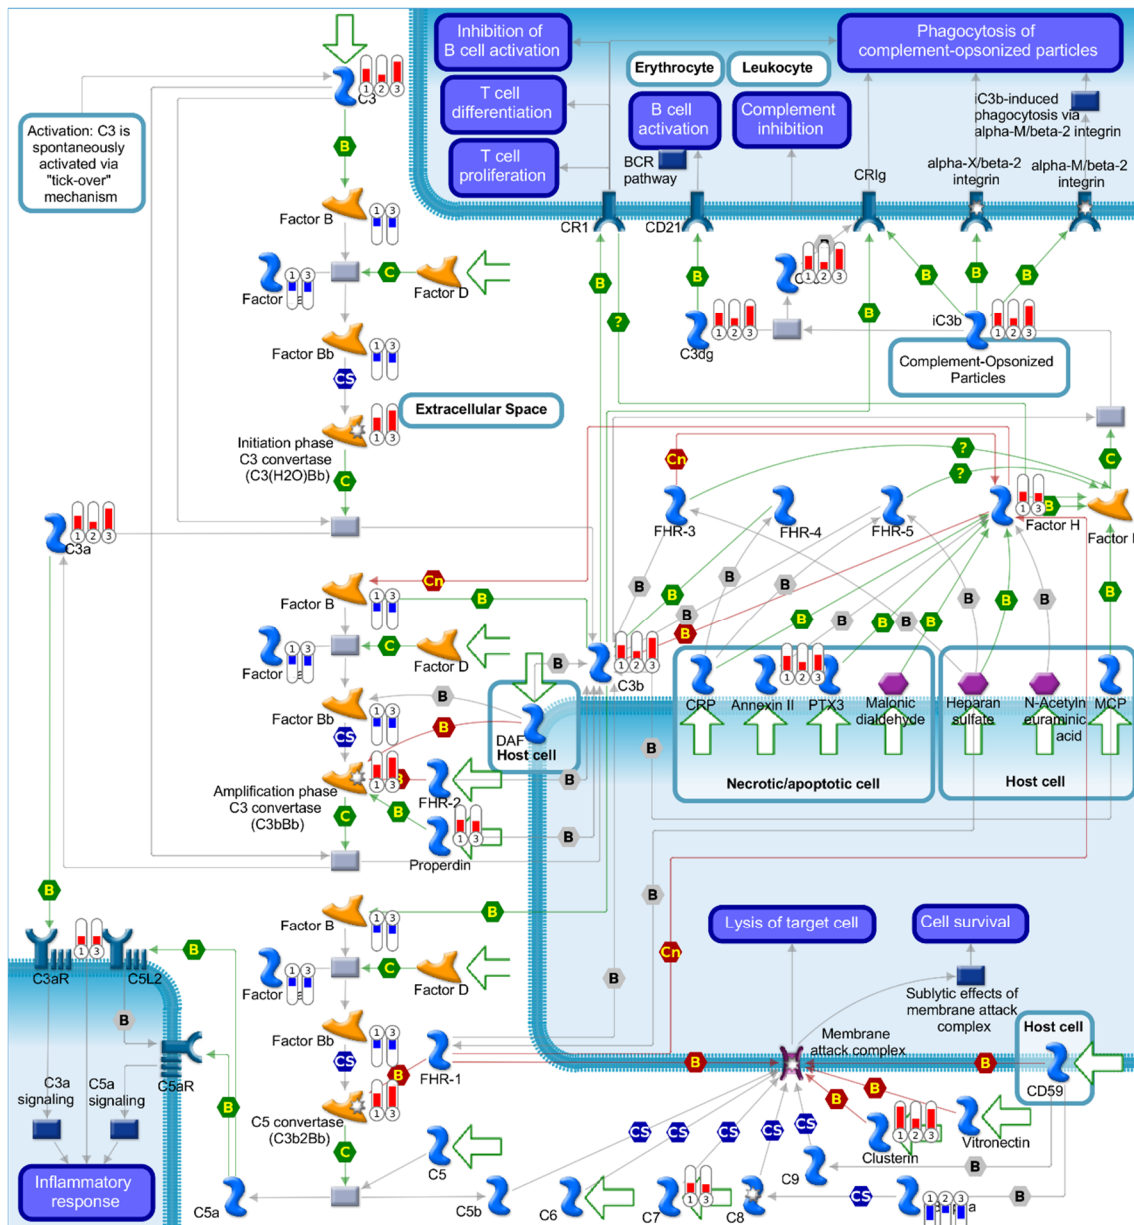

**Figure. S3** Map of alternative complement pathway. Significantly altered ( $p < 0.05$ ; fold change  $\pm 2$ ) genes for AAI-exposed *Trp53*(+/+), *Trp53*(+/-) and *Trp53*(-/-) mouse kidneys were compared in MetaCore™. The enriched pathway (3<sup>rd</sup> out of top 50;  $p < 0.05$ ) shows up-regulated (thermometer-like symbols in red) and down-regulated (thermometer-like symbols in blue) genes. Numbers indicate genotype: 1) *Trp53*(+/+), 2) *Trp53*(+/-) and 3) *Trp53*(-/-). For detailed legend see **Figure. S22**.

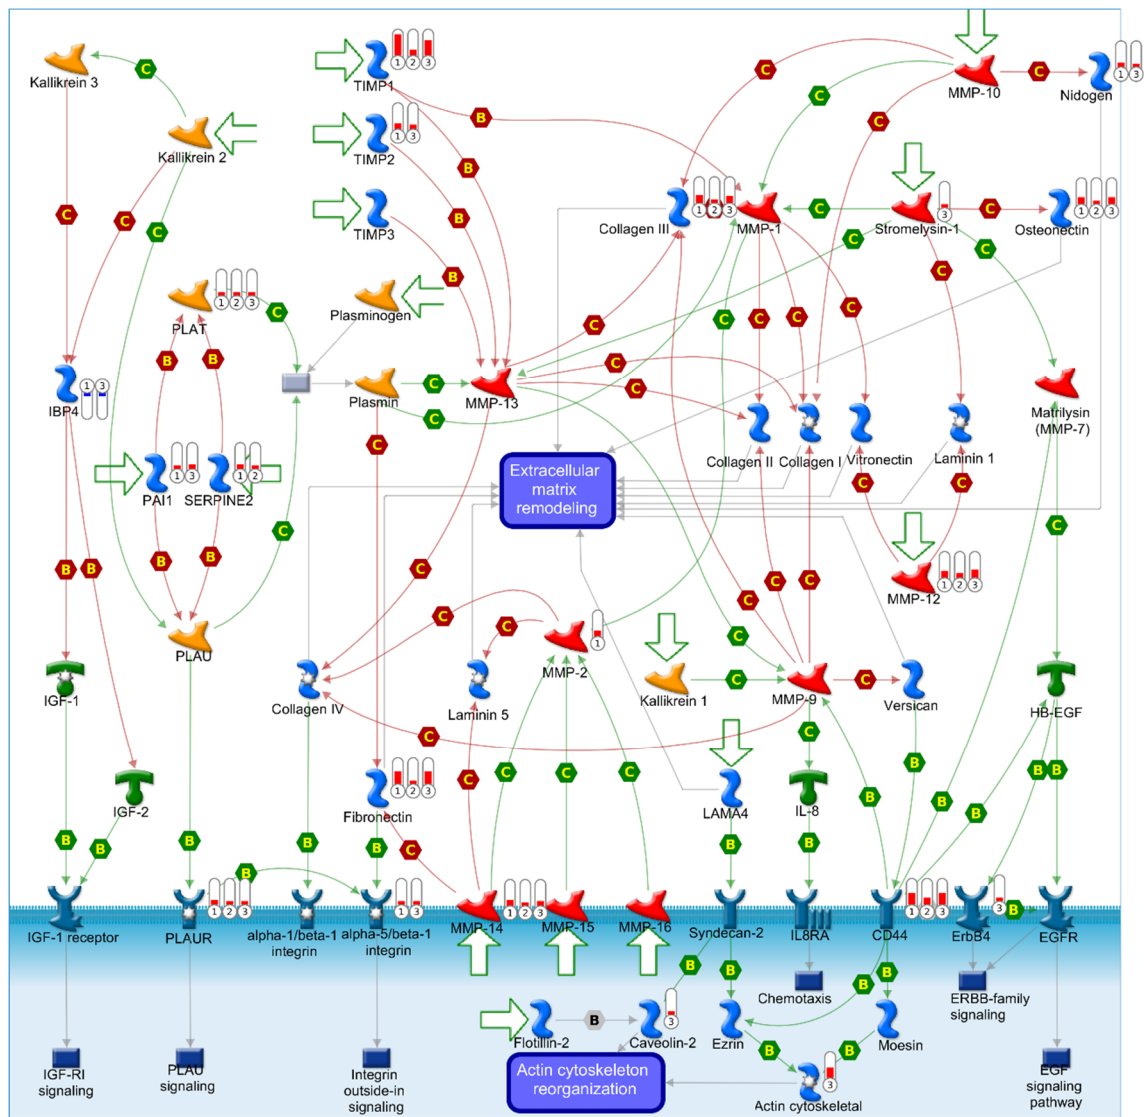

**Figure. S4** Map of extracellular matrix remodelling. Significantly altered ( $p < 0.05$ ; fold change  $\pm 2$ ) genes for AAI-exposed *Trp53*(+/+), *Trp53*(+/-) and *Trp53*(-/-) mouse kidneys were compared in MetaCore™. The enriched pathway (4<sup>th</sup> out of top 50;  $p < 0.05$ ) shows up-regulated (thermometer-like symbols in red) and down-regulated (thermometer-like symbols in blue) genes. Numbers indicate genotype: 1) *Trp53*(+/+), 2) *Trp53*(+/-) and 3) *Trp53*(-/-). For detailed legend see **Figure. S22**.



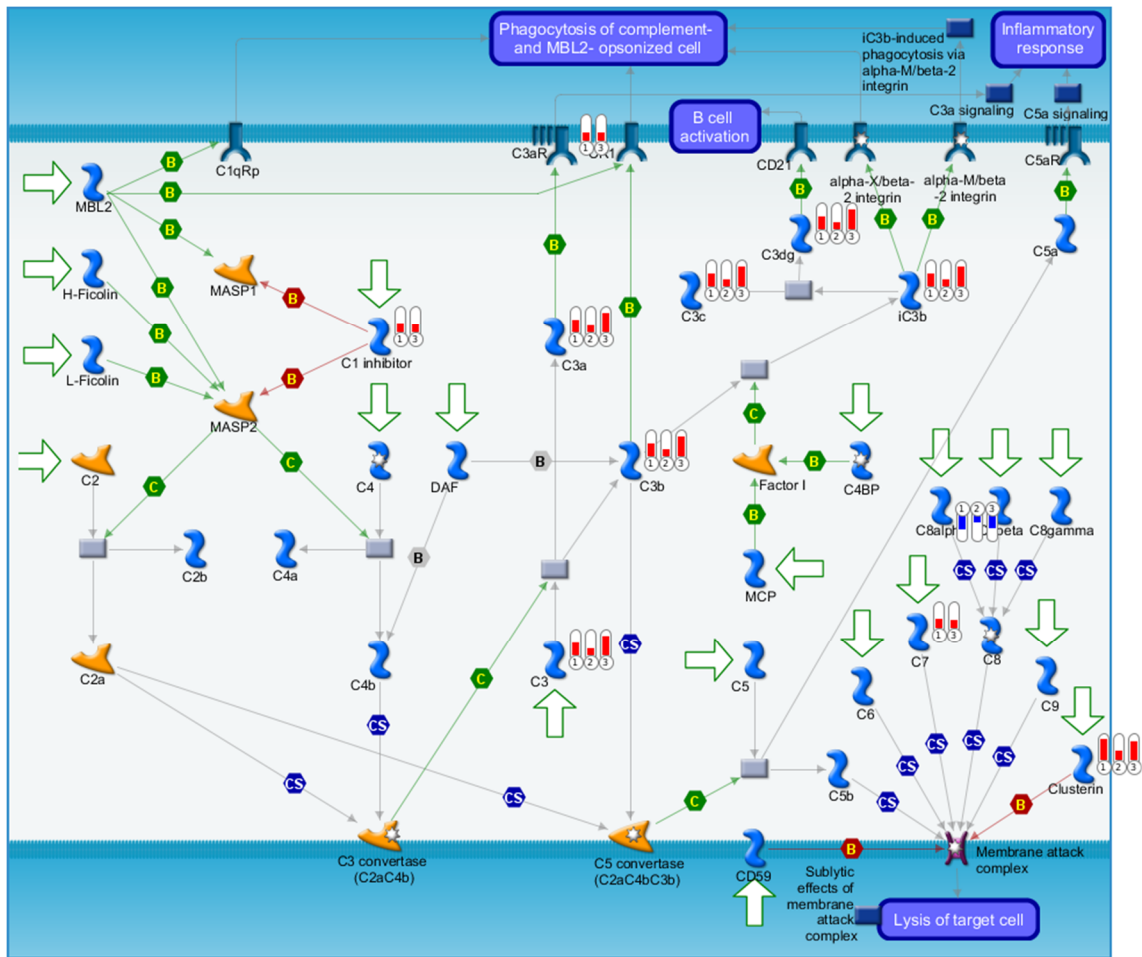

**Figure. S5** Map of lectin-induced complement pathway. Significantly altered ( $p < 0.05$ ; fold change  $\pm 2$ ) genes for AAI-exposed *Trp53*(+/+), *Trp53*(+/-) and *Trp53*(-/-) mouse kidneys were compared in MetaCore™. The enriched pathway (6<sup>th</sup> out of top 50;  $p < 0.05$ ) shows up-regulated (thermometer-like symbols in red) genes. Numbers indicate genotype: 1) *Trp53*(+/+), 2) *Trp53*(+/-) and 3) *Trp53*(-/-). For detailed legend see **Figure. S22**.

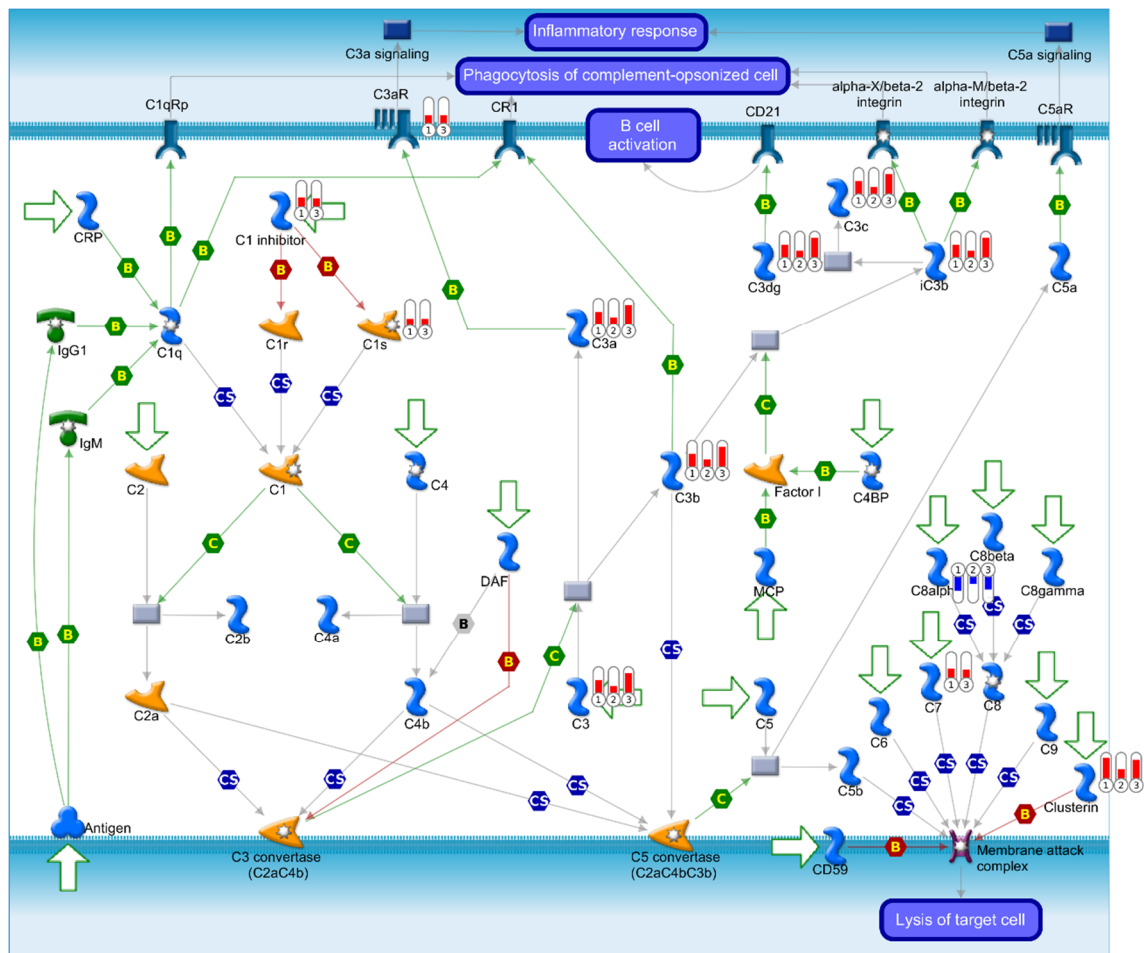

**Figure. S6** Map of classical complement pathway. Significantly altered ( $p < 0.05$ ; fold change  $\pm 2$ ) genes for AAI-exposed *Trp53*(+/+), *Trp53*(+/-) and *Trp53*(-/-) mouse kidneys were compared in MetaCore™. The enriched pathway (8<sup>th</sup> out of top 50;  $p < 0.05$ ) shows up-regulated (thermometer-like symbols in red) and down-regulated (thermometer-like symbols in blue) genes. Numbers indicate genotype: 1) *Trp53*(+/+), 2) *Trp53*(+/-) and 3) *Trp53*(-/-). For detailed legend see **Figure. S22**.

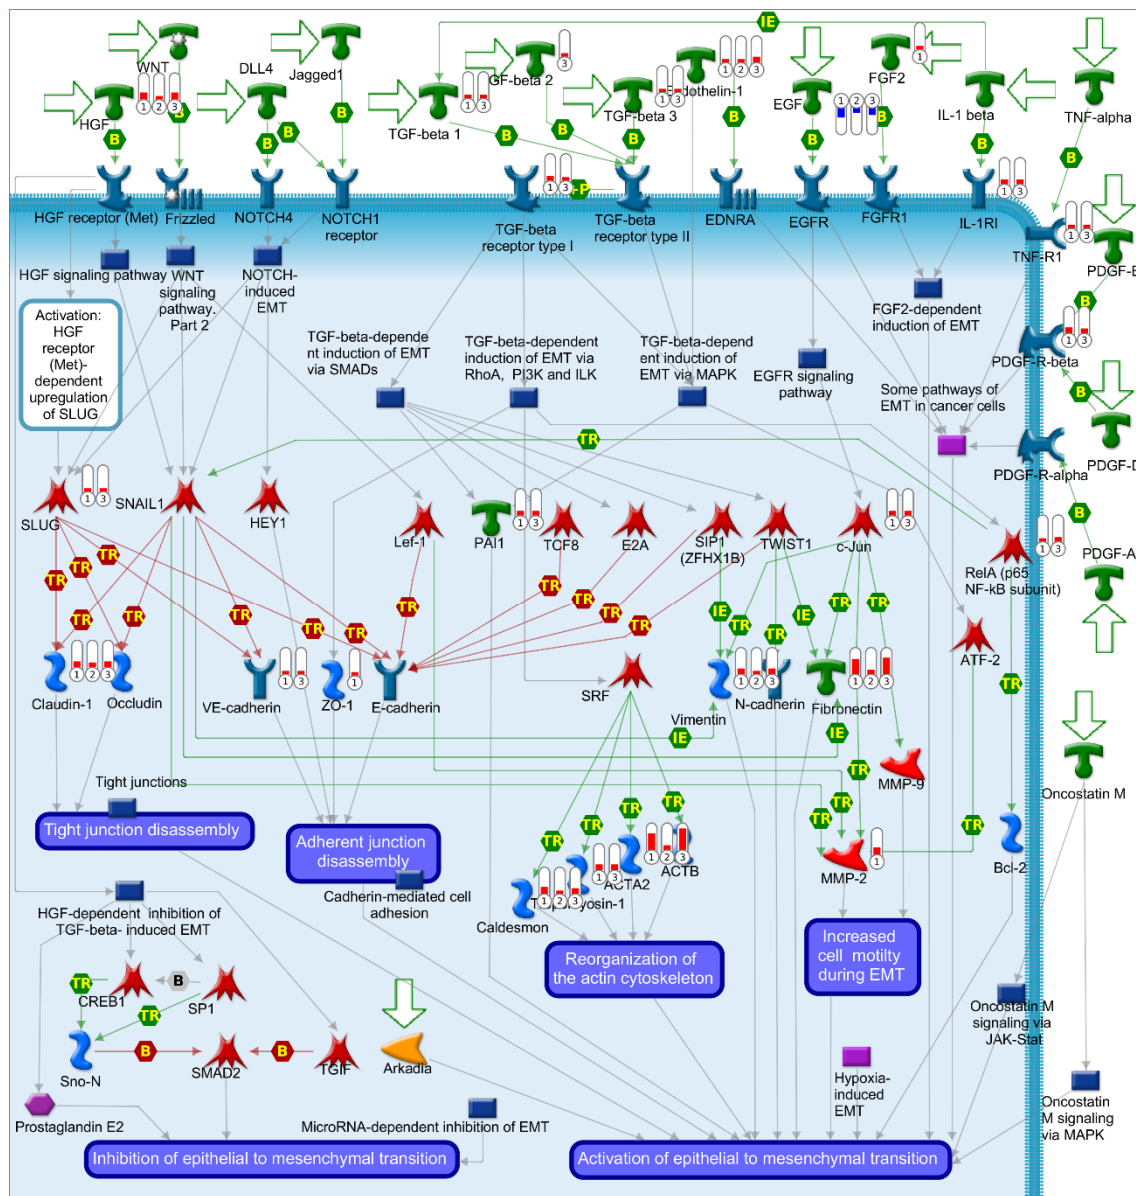

**Figure. S7** Map of regulation of EMT. Significantly altered ( $p < 0.05$ ; fold change  $\pm 2$ ) genes for AAI-exposed *Trp53*(+/+), *Trp53*(+/-) and *Trp53*(-/-) mouse kidneys were compared in MetaCore™. The enriched pathway (11<sup>th</sup> out of top 50;  $p < 0.05$ ) shows up-regulated (thermometer-like symbols in red) and down-regulated (thermometer-like symbols in blue) genes. Numbers indicate genotype: 1) *Trp53*(+/+), 2) *Trp53*(+/-) and 3) *Trp53*(-/-). For detailed legend see **Figure. S22**. Abbreviation: epithelial-to-mesenchymal transition (EMT).



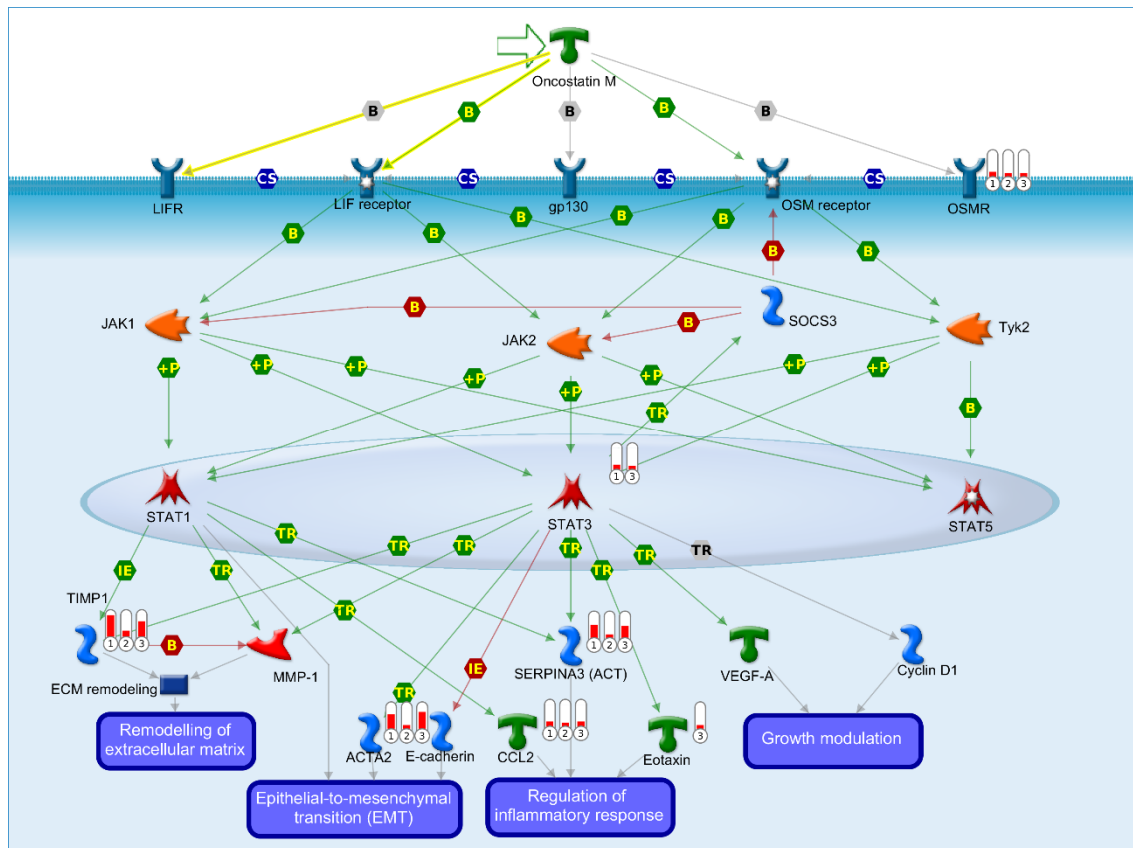

**Figure. S9** Map of oncostatin M signalling via JAK-STAT. Significantly altered ( $p < 0.05$ ; fold change  $\pm 2$ ) genes for AAI-exposed *Trp53*(+/+), *Trp53*(+/-) and *Trp53*(-/-) mouse kidneys were compared in MetaCore™. The enriched pathway (14<sup>th</sup> out of top 50;  $p < 0.05$ ) shows up-regulated (thermometer-like symbols in red) genes. Numbers indicate genotype: 1) *Trp53*(+/+), 2) *Trp53*(+/-) and 3) *Trp53*(-/-). For detailed legend see **Figure. S22**. Abbreviations: Janus kinase (JAK); signal transducer and activator of transcription (STAT).



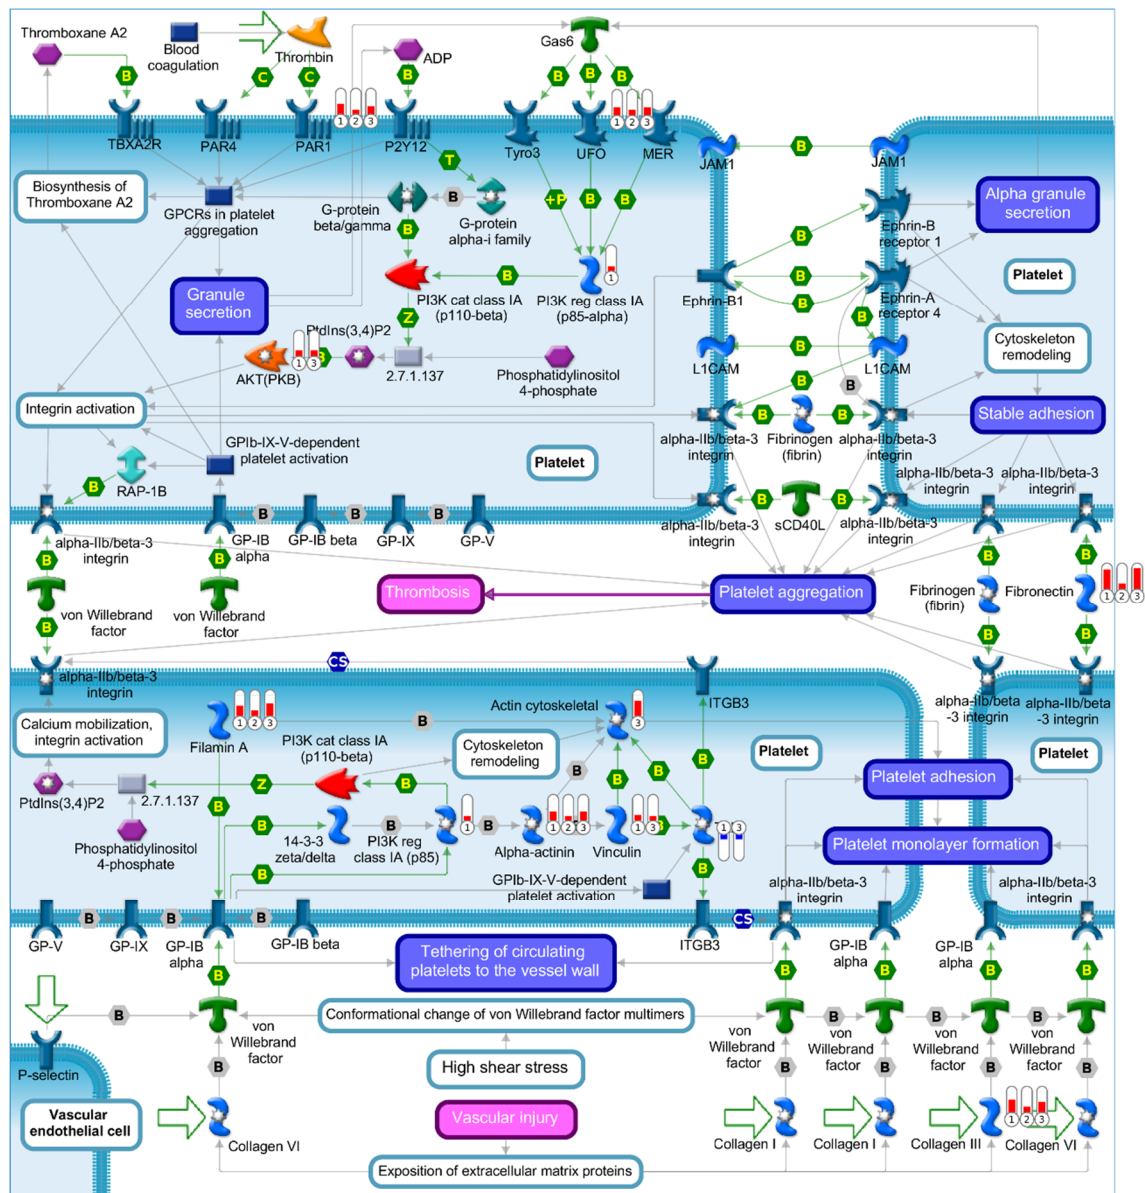

**Figure. S10** Map of high shear stress-induced platelet activation. Significantly altered ( $p < 0.05$ ; fold change  $\pm 2$ ) genes for AAI-exposed *Trp53*(+/+), *Trp53*(+/-) and *Trp53*(-/-) mouse kidneys were compared in MetaCore™. The enriched pathway (18<sup>th</sup> out of top 50;  $p < 0.05$ ) shows up-regulated (thermometer-like symbols in red) and down-regulated (thermometer-like symbols in blue) genes. Numbers indicate genotype: 1) *Trp53*(+/+), 2) *Trp53*(+/-) and 3) *Trp53*(-/-). For detailed legend see **Figure. S22**.



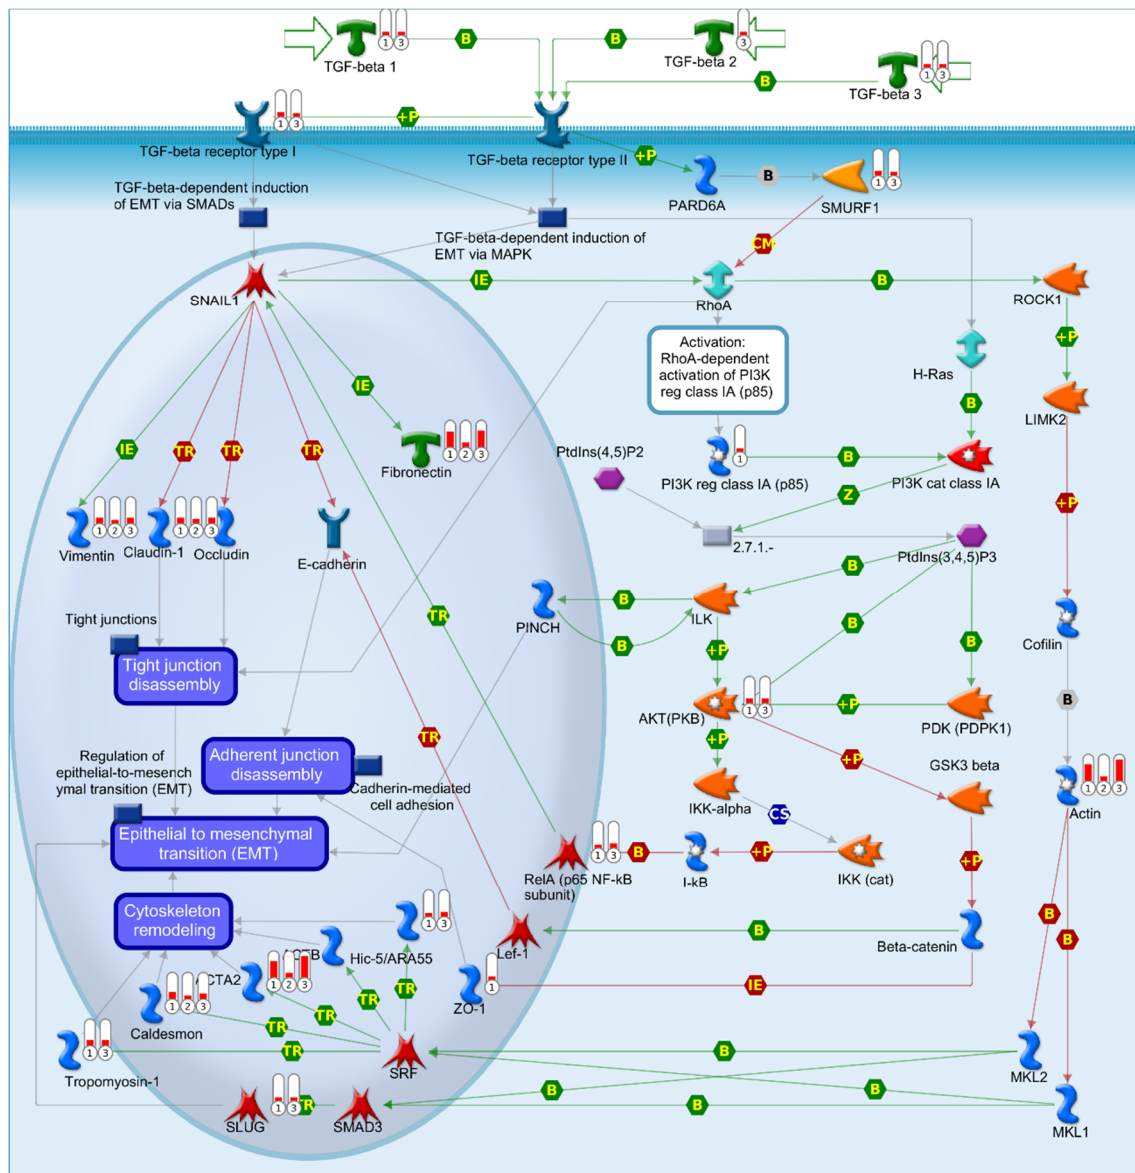

**Figure. S11** Map of TGF- $\beta$ -dependent induction of EMT via RhoA, PI3K and ILK. Significantly altered ( $p < 0.05$ ; fold change  $\pm 2$ ) genes for AAI-exposed *Trp53*(+/+), *Trp53*(+/-) and *Trp53*(-/-) mouse kidneys were compared in MetaCore™. The enriched pathway (19<sup>th</sup> out of top 50;  $p < 0.05$ ) shows up-regulated (thermometer-like symbols in red) genes. Numbers indicate genotype: 1) *Trp53*(+/+), 2) *Trp53*(+/-) and 3) *Trp53*(-/-). For detailed legend see **Figure. S22**. Abbreviations: epithelial-to-mesenchymal transition (EMT); integrin-linked protein kinase (ILK); phosphoinositide 3-kinase (PI3K); RAS homolog gene family, member A (RhoA); transforming growth factor  $\beta$  (TGF- $\beta$ ).

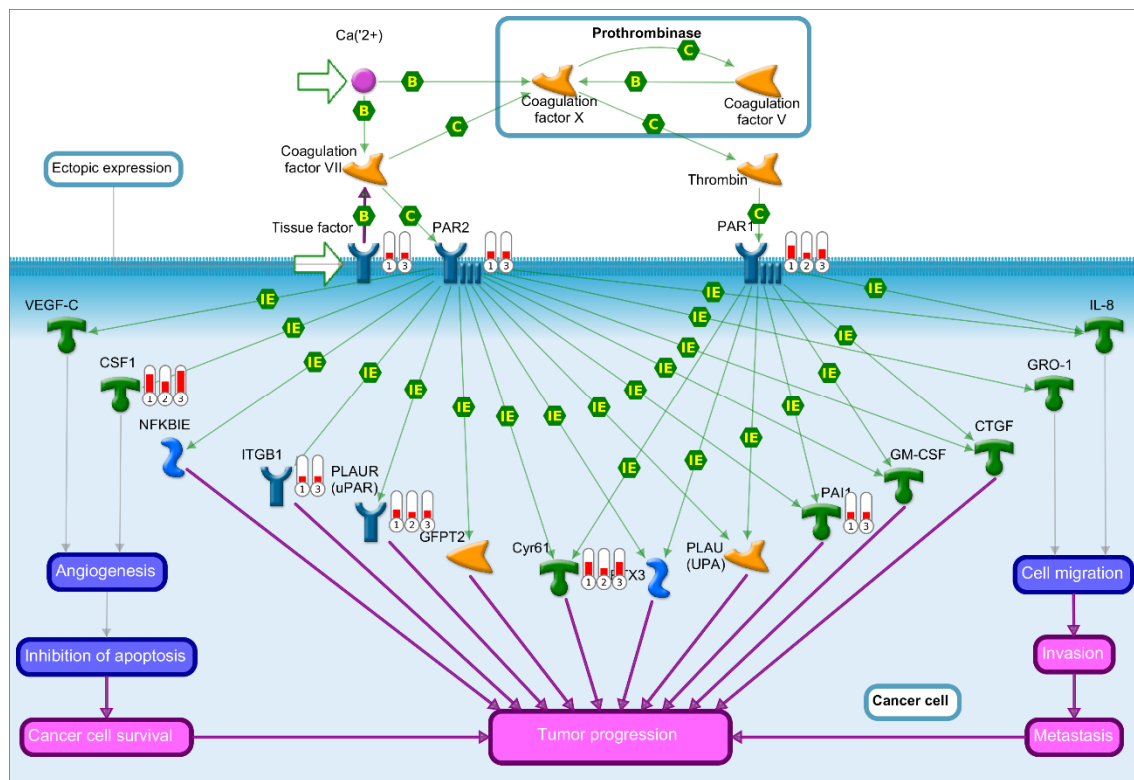

**Figure. S12** Map of tissue factor signalling in cancer. Significantly altered ( $p < 0.05$ ; fold change  $\pm 2$ ) genes for AAI-exposed *Trp53*(+/+), *Trp53*(+/-) and *Trp53*(-/-) mouse kidneys were compared in MetaCore™. The enriched pathway (26<sup>th</sup> out of top 50;  $p < 0.05$ ) shows up-regulated (thermometer-like symbols in red) genes. Numbers indicate genotype: 1) *Trp53*(+/+), 2) *Trp53*(+/-) and 3) *Trp53*(-/-). For detailed legend see **Figure. S22**.



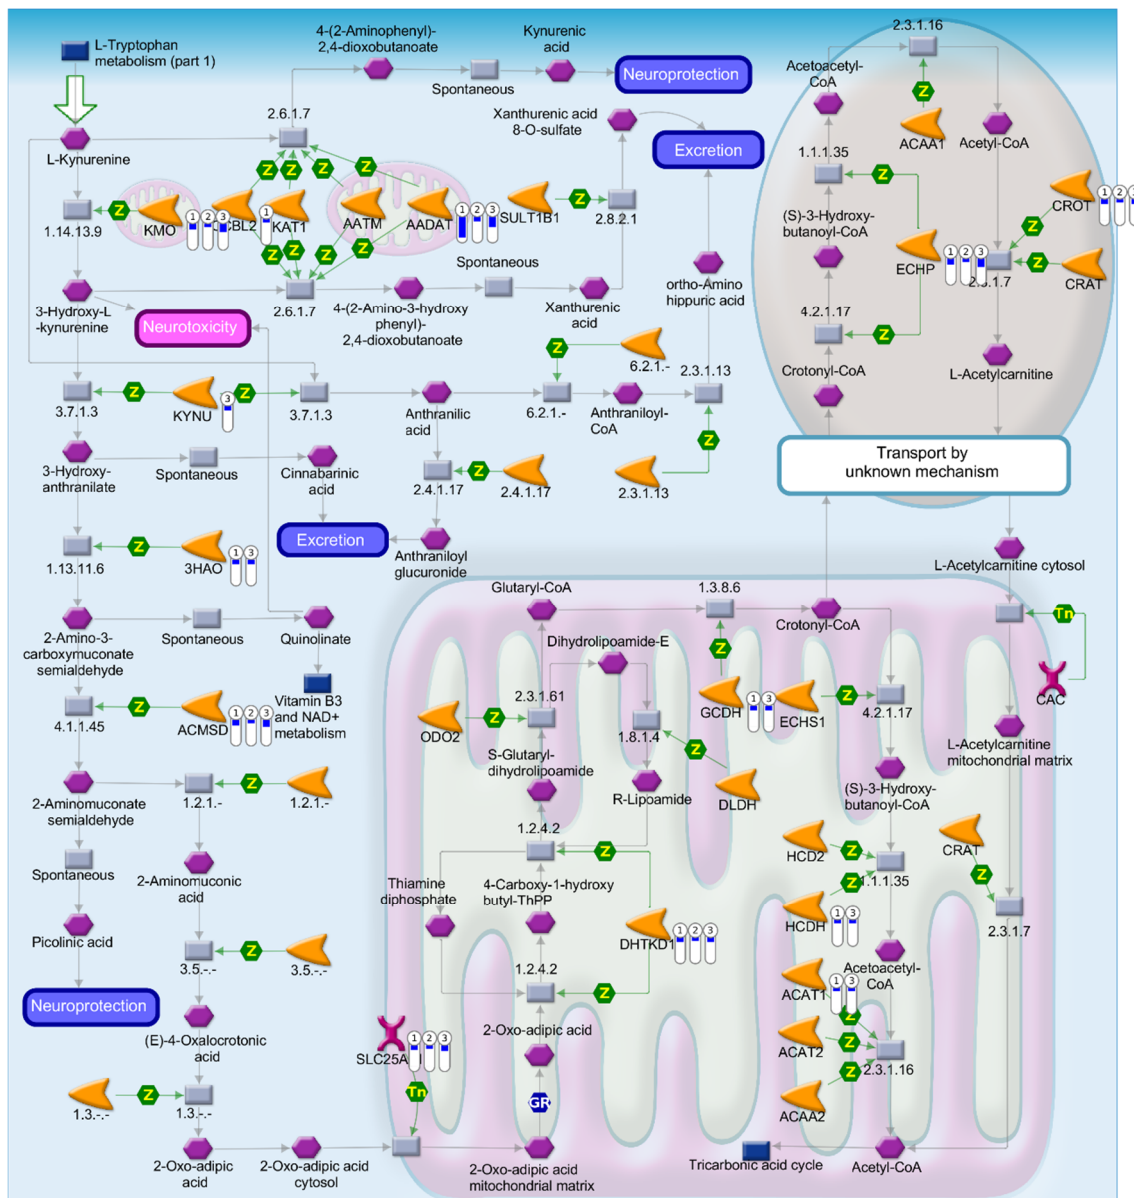

**Figure. S14** Map of L-Tryptophan metabolism. Significantly altered ( $p < 0.05$ ; fold change  $\pm 2$ ) genes for AAI-exposed *Trp53(+/+)*, *Trp53(+/-)* and *Trp53(-/-)* mouse kidneys were compared in MetaCore™. The enriched pathway (37<sup>th</sup> out of top 50;  $p < 0.05$ ) shows down-regulated (thermometer-like symbols in blue) genes. Numbers indicate genotype: 1) *Trp53(+/+)*, 2) *Trp53(+/-)* and 3) *Trp53(-/-)*. For detailed legend see **Figure. S22**.

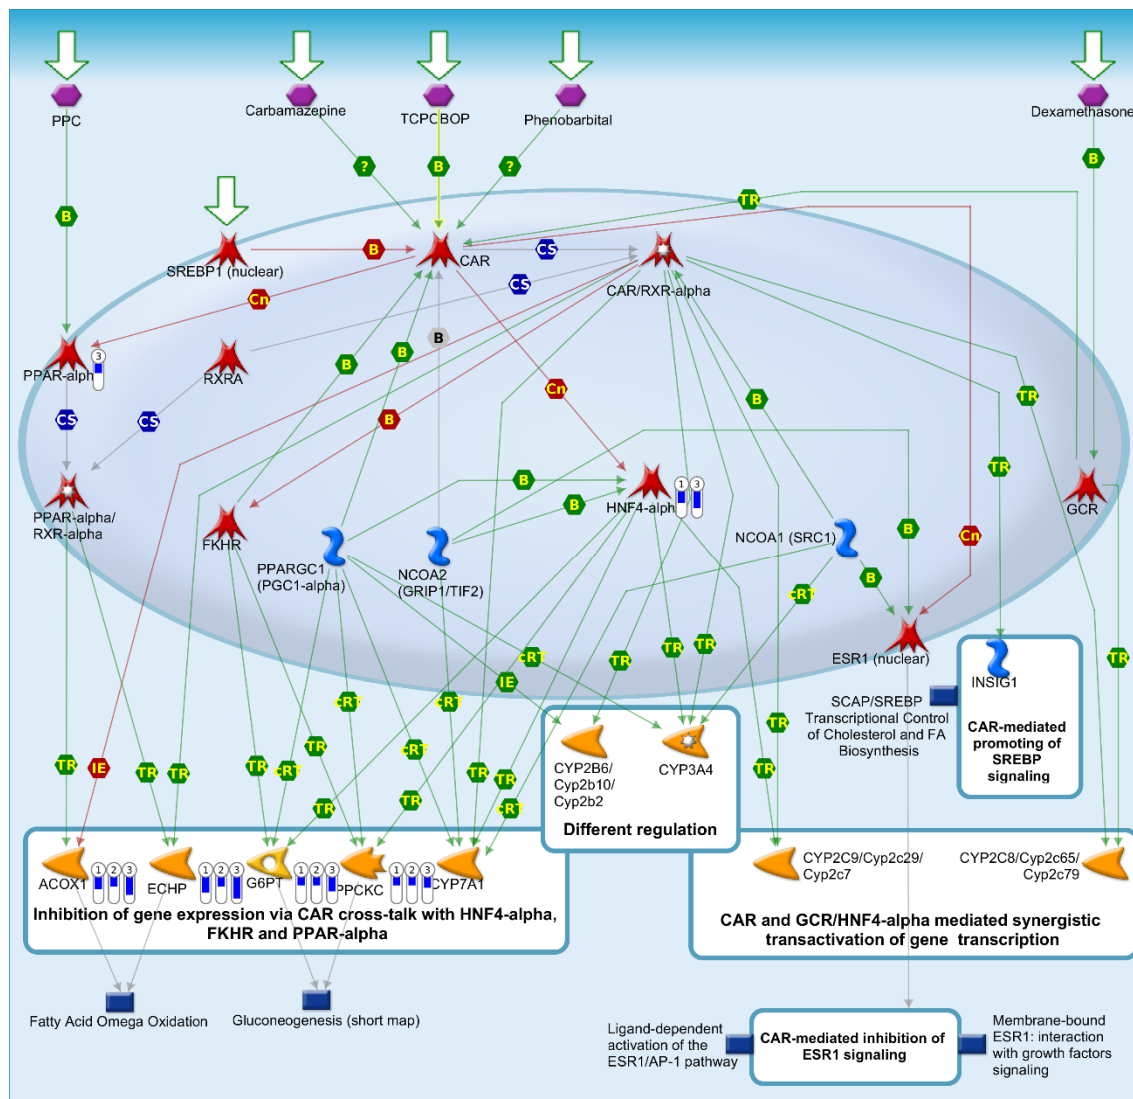

**Figure. S15** Map of CAR signalling via cross-talk in rodents. Significantly altered ( $p < 0.05$ ; fold change  $\pm 2$ ) genes for AAI-exposed *Trp53*(+/+), *Trp53*(+/-) and *Trp53*(-/-) mouse kidneys were compared in MetaCore™. The enriched pathway (38<sup>th</sup> out of top 50;  $p < 0.05$ ) shows down-regulated (thermometer-like symbols in blue) genes. Numbers indicate genotype: 1) *Trp53*(+/+), 2) *Trp53*(+/-) and 3) *Trp53*(-/-). For detailed legend see **Figure. S22**. Abbreviation: constitutive androstane receptor (CAR).



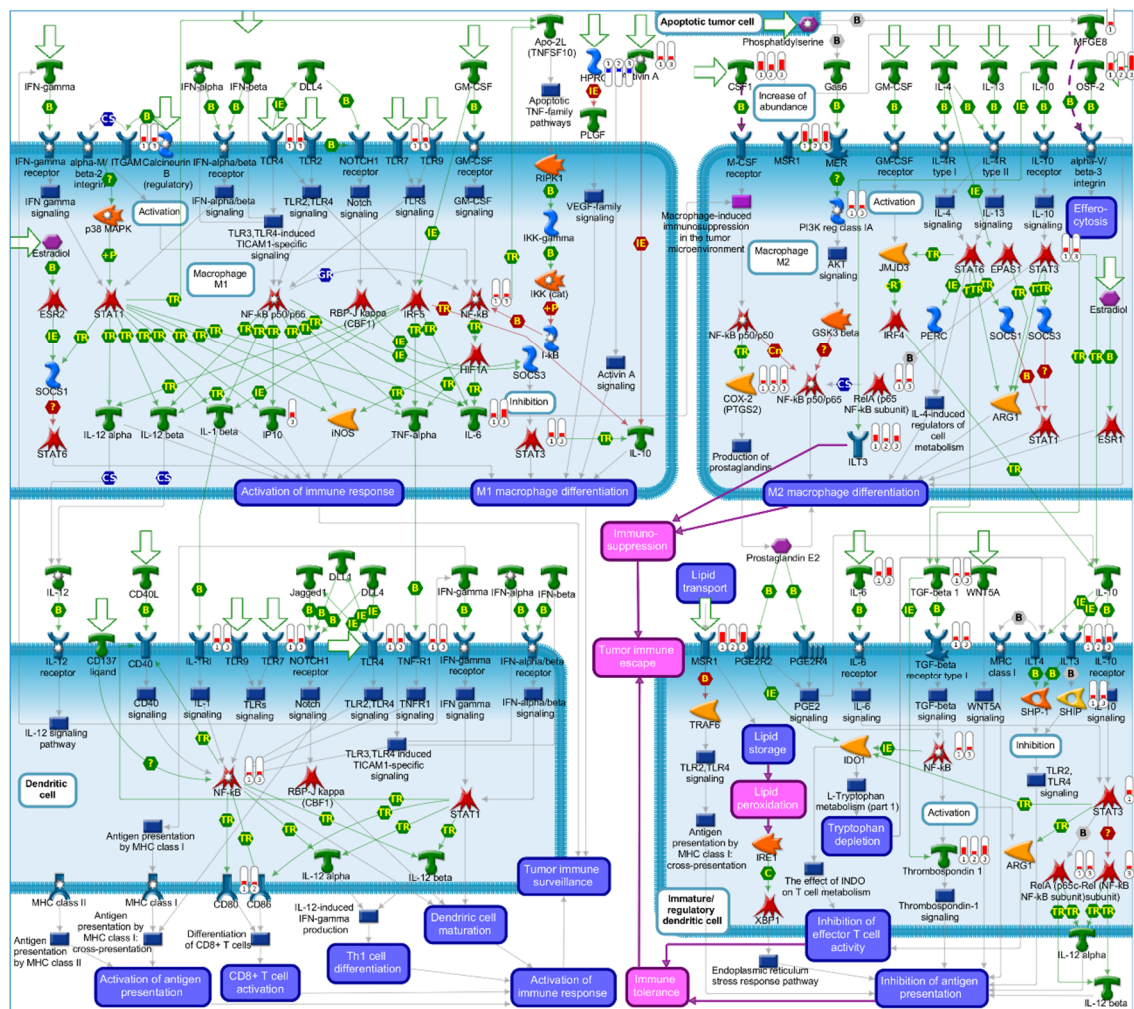

**Figure. S16** Map of macrophage and dendritic cell phenotype shift in cancer. Significantly altered ( $p < 0.05$ ; fold change  $\pm 2$ ) genes for AAI-exposed *Trp53*(+/+), *Trp53*(+/-) and *Trp53*(-/-) mouse kidneys were compared in MetaCore™. The enriched pathway (41<sup>st</sup> out of top 50;  $p < 0.05$ ) shows up-regulated (thermometer-like symbols in red) and down-regulated (thermometer-like symbols in blue) genes. Numbers indicate genotype: 1) *Trp53*(+/+), 2) *Trp53*(+/-) and 3) *Trp53*(-/-). For detailed legend see **Figure. S22**.



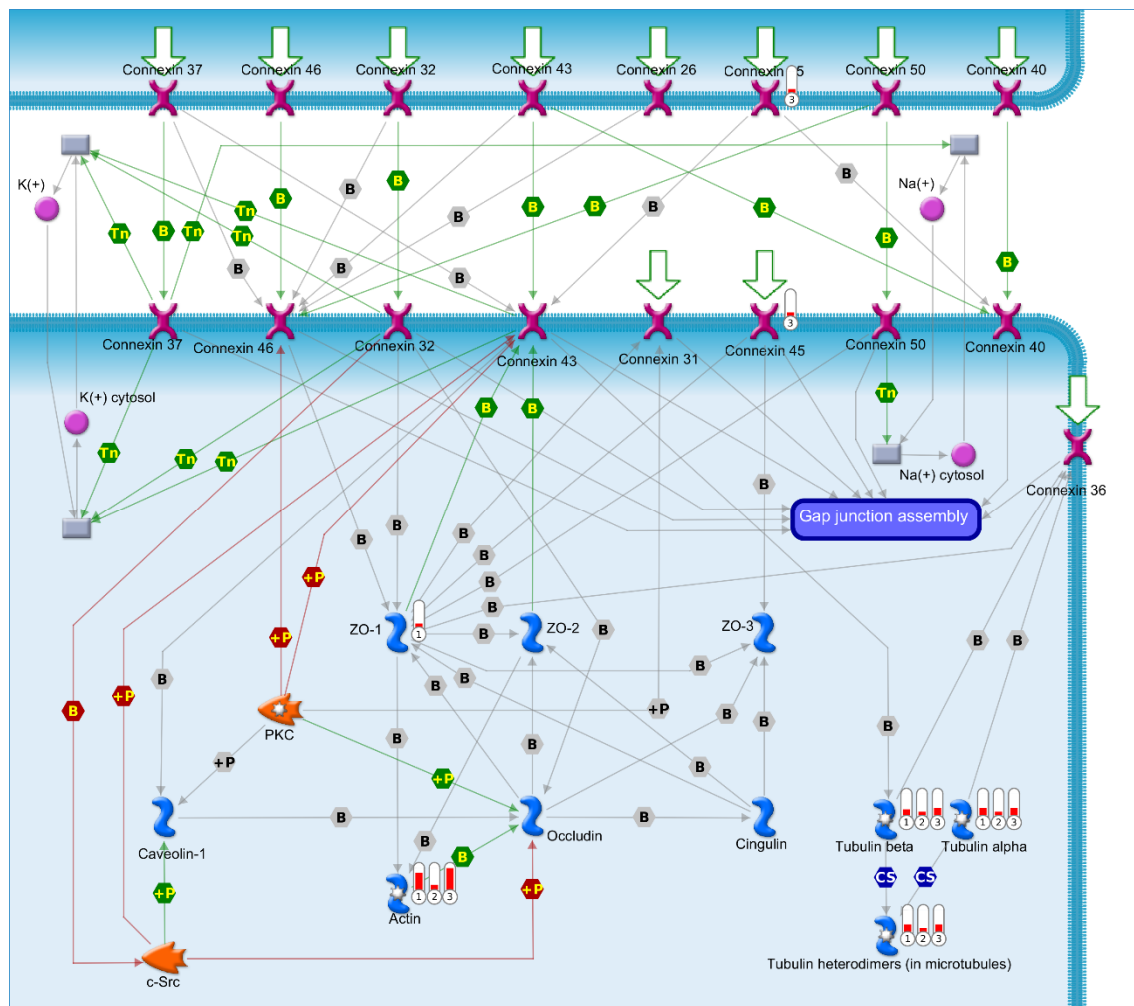

**Figure. S17** Map of gap junctions. Significantly altered ( $p < 0.05$ ; fold change  $\pm 2$ ) genes for AAI-exposed *Trp53*(+/+), *Trp53*(+/-) and *Trp53*(-/-) mouse kidneys were compared in MetaCore™. The enriched pathway (44<sup>th</sup> out of top 50;  $p < 0.05$ ) shows up-regulated (thermometer-like symbols in red) genes. Numbers indicate genotype: 1) *Trp53*(+/+), 2) *Trp53*(+/-) and 3) *Trp53*(-/-). For detailed legend see **Figure. S22**.

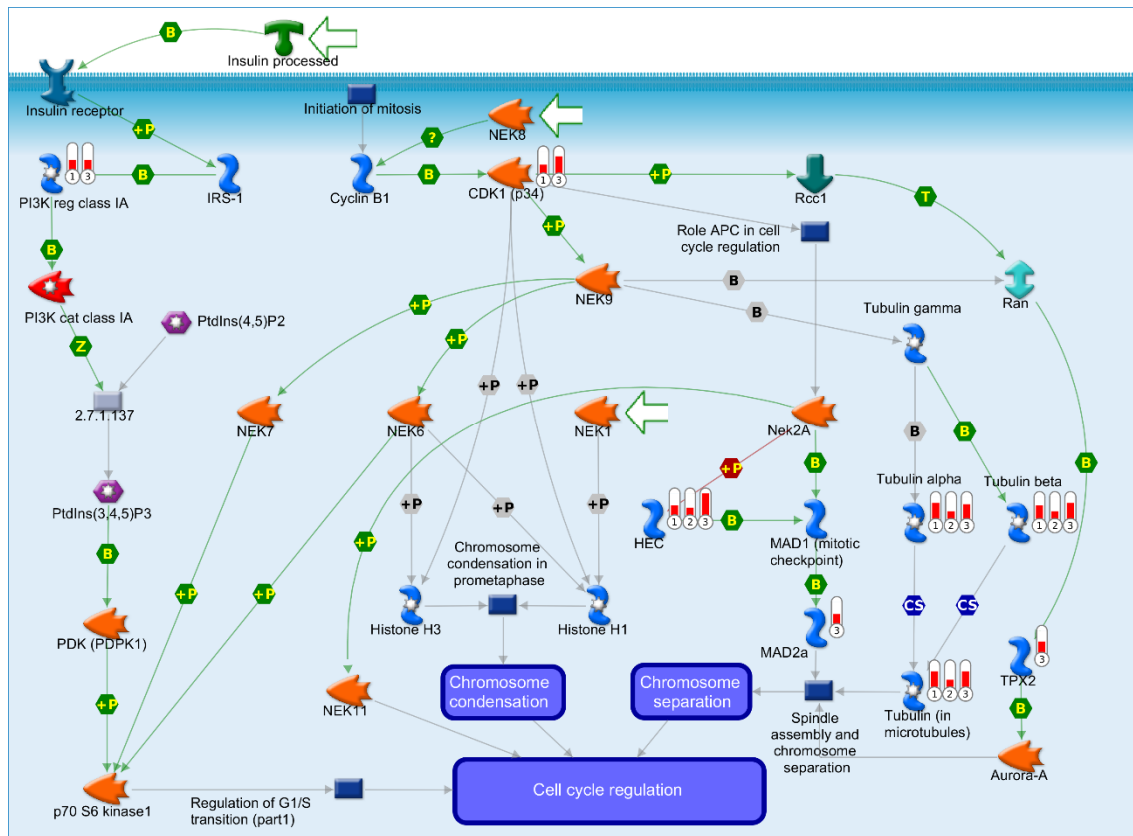

**Figure. S18** Map of role of NEK in cell cycle regulation. Significantly altered ( $p < 0.05$ ; fold change  $\pm 2$ ) genes for AAI-exposed *Trp53*(+/+), *Trp53*(+/-) and *Trp53*(-/-) mouse kidneys were compared in MetaCore™. The enriched pathway (47<sup>th</sup> out of top 50;  $p < 0.05$ ) shows up-regulated (thermometer-like symbols in red) genes. Numbers indicate genotype: 1) *Trp53*(+/+), 2) *Trp53*(+/-) and 3) *Trp53*(-/-). For detailed legend see **Figure. S22**. Abbreviation: never in mitosis, gene A-related kinase (NEK).

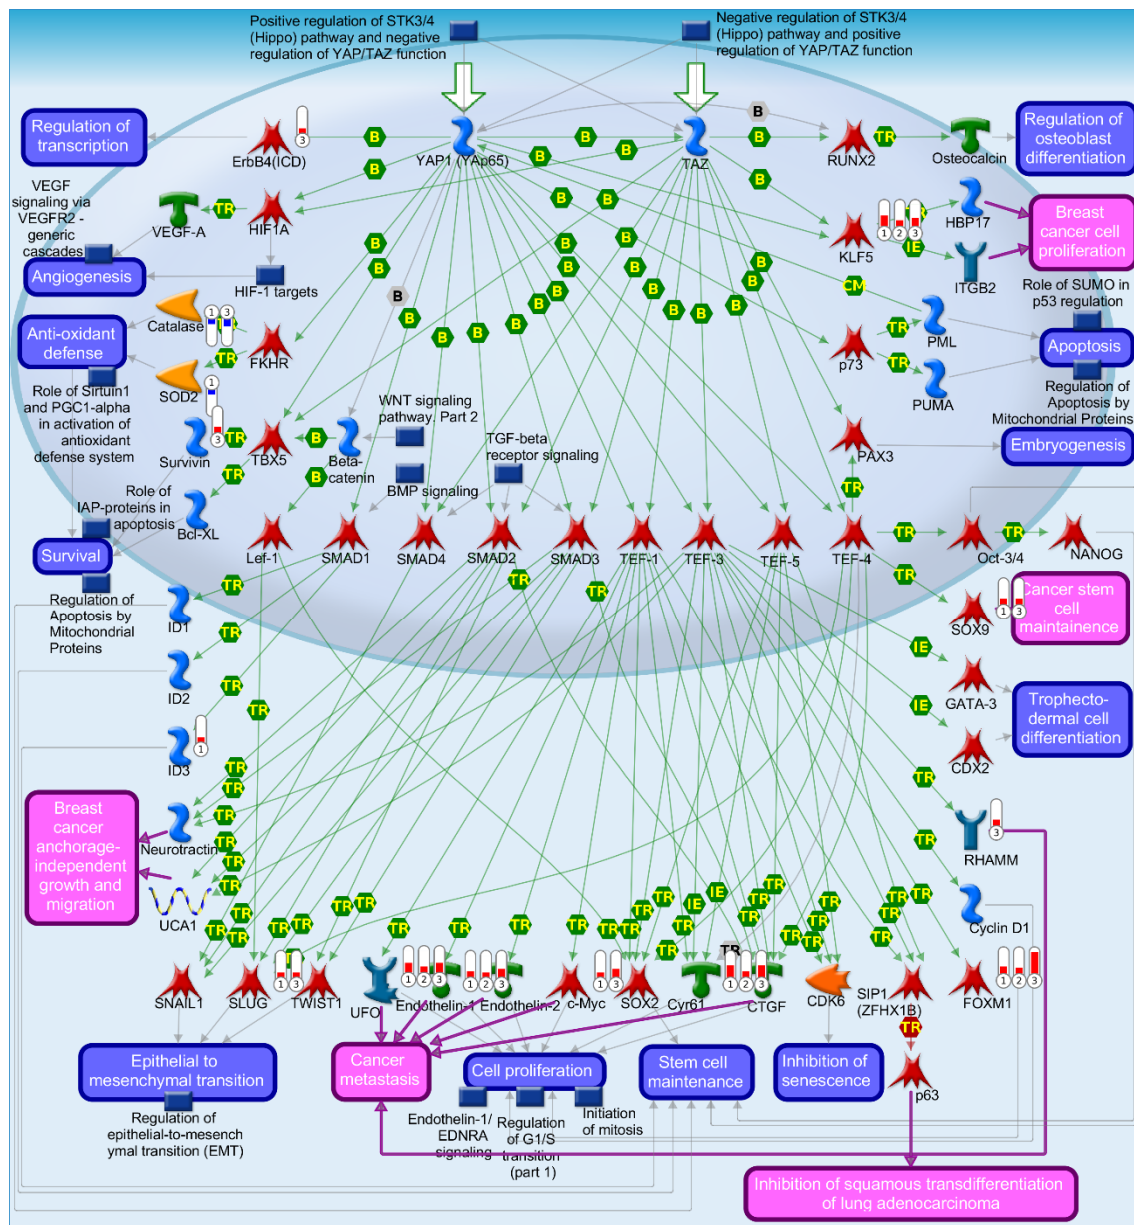

**Figure. S19** Map of YAP/TAZ-mediated co-regulation of transcription. Significantly altered ( $p < 0.05$ ; fold change  $\pm 2$ ) genes for AAI-exposed *Trp53*(+/+), *Trp53*(+/-) and *Trp53*(-/-) mouse kidneys were compared in MetaCore™. The enriched pathway (49<sup>th</sup> out of top 50;  $p < 0.05$ ) shows up-regulated (thermometer-like symbols in red) and down-regulated (thermometer-like symbols in blue) genes. Numbers indicate genotype: 1) *Trp53*(+/+), 2) *Trp53*(+/-) and 3) *Trp53*(-/-). For detailed legend see **Figure. S22**. Abbreviations: Tafazzin (TAZ); yes-associated protein (YAP).

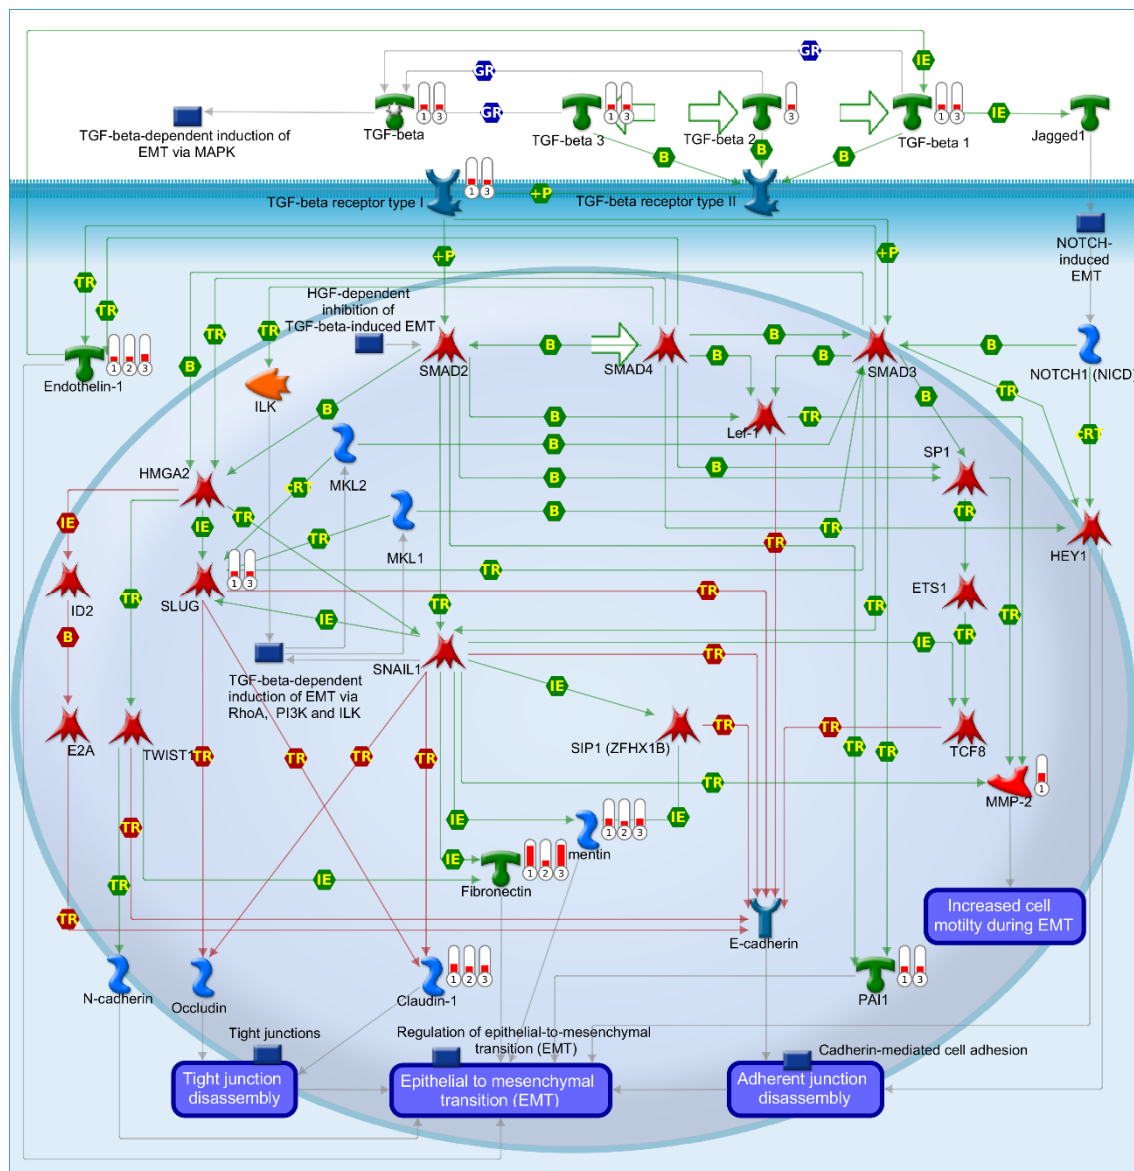

**Figure. S20** Map of TGF- $\beta$ -dependent induction of EMT via SMADs. Significantly altered ( $p < 0.05$ ; fold change  $\pm 2$ ) genes for AAI-exposed *Trp53*(+/+), *Trp53*(+/-) and *Trp53*(-/-) mouse kidneys were compared in MetaCore™. The enriched pathway (50<sup>th</sup> out of top 50;  $p < 0.05$ ) shows up-regulated (thermometer-like symbols in red) genes. Numbers indicate genotype: 1) *Trp53*(+/+), 2) *Trp53*(+/-) and 3) *Trp53*(-/-). For detailed legend see **Figure. S22**. Abbreviations: epithelial-to-mesenchymal transition (EMT); *Sma* mothers against DPP homology (SMAD); transforming growth factor  $\beta$  (TGF- $\beta$ ).

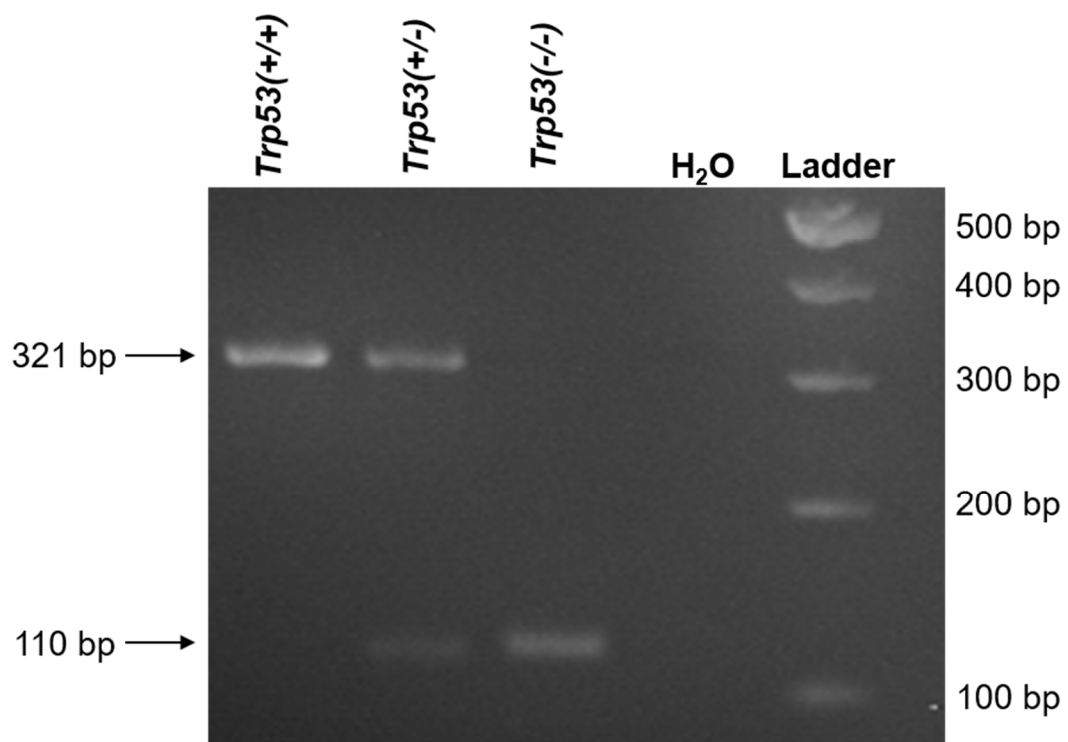

**Figure. S21** Example of a *Trp53*(+/+), *Trp53*(+/-) and *Trp53*(-/-) mouse genotyping PCR. H<sub>2</sub>O indicates the negative control. bp, base pairs.

MetaCore

# Quick reference guide

User Data

| NETWORKS                                                                                                                                                            | MAPS                                                                              |
|---------------------------------------------------------------------------------------------------------------------------------------------------------------------|-----------------------------------------------------------------------------------|
|  Up-regulated (+)<br>Object has user data with positive value                      |  |
|  Down-regulated (-)<br>Object has user data with negative value                    |  |
|  Mixed-signal (+/-)<br>Object has user data with both positive and negative values |  |
|  Gene variants<br>Object has user data with gene variants                          |  |
|  Mixed data<br>Object has user data with both expression values and gene variants  |  |

Network Objects

| ENZYMES                                                                                                                                                                         |                                                                                                       | GENERIC CLASSES                                                                                                             |  |
|---------------------------------------------------------------------------------------------------------------------------------------------------------------------------------|-------------------------------------------------------------------------------------------------------|-----------------------------------------------------------------------------------------------------------------------------|--|
|  Generic enzyme                                                                                |                                                                                                       |  Receptor ligand                           |  |
| <b>KINASE</b>                                                                                                                                                                   | <b>PHOSPHATASE</b>                                                                                    |  Transcription factor                      |  |
|  Generic kinase                                                                                |  Generic phosphatase |  Protein                                   |  |
|  Protein kinase                                                                                |  Protein phosphatase |  Compound                                  |  |
|  Lipid kinase                                                                                 |  Lipid phosphatase  |  Predicted metabolite or user's structure |  |
| <b>PHOSPHOLIPASE</b>                                                                                                                                                            |                                                                                                       |  Inorganic ion                           |  |
|  Generic phospholipase                                                                       |                                                                                                       |  Reaction                                |  |
| <b>PROTEASE</b>                                                                                                                                                                 | <b>GTPASE</b>                                                                                         |  DNA                                     |  |
|  Generic protease                                                                            |  G-alpha           |  RNA                                     |  |
|  Metalloprotease                                                                             |  RAS - superfamily |  Generic binding protein                 |  |
|                                                                                                                                                                                 |                                                                                                       |  Cell membrane glycoprotein              |  |
| <b>CHANNELS/TRANSPORTERS</b>                                                                                                                                                    |                                                                                                       | <b>G PROTEIN ADAPTOR/REGULATORS</b>                                                                                         |  |
|  Generic channel                                                                             |                                                                                                       |  G beta/gamma                            |  |
|  Ligand-gated ion channel                                                                    |                                                                                                       |  Regulators (GDI, GAP, GET, etc.)        |  |
|  Voltage-gated ion channel                                                                   |                                                                                                       |                                                                                                                             |  |
|  Transporter                                                                                 |                                                                                                       |                                                                                                                             |  |
|                                                                                                                                                                                 |                                                                                                       |                                                                                                                             |  |
| <b>GROUPS OF OBJECTS</b>                                                                                                                                                        |                                                                                                       |                                                                                                                             |  |
|  A complex or a group<br>Proteins physically connected into a complex or related as a family |                                                                                                       |                                                                                                                             |  |
|  Logical association<br>Proteins linked by logical relations or physical interactions        |                                                                                                       |                                                                                                                             |  |
|  Custom association<br>Group of collapsed objects chosen by user                             |                                                                                                       |                                                                                                                             |  |

Cortellis  
Powering Life Sciences Innovation

Clarivate  
Analytics

Figure. S22 MetaCore™ “Quick reference guide” (Part 1).



## Interactions between objects

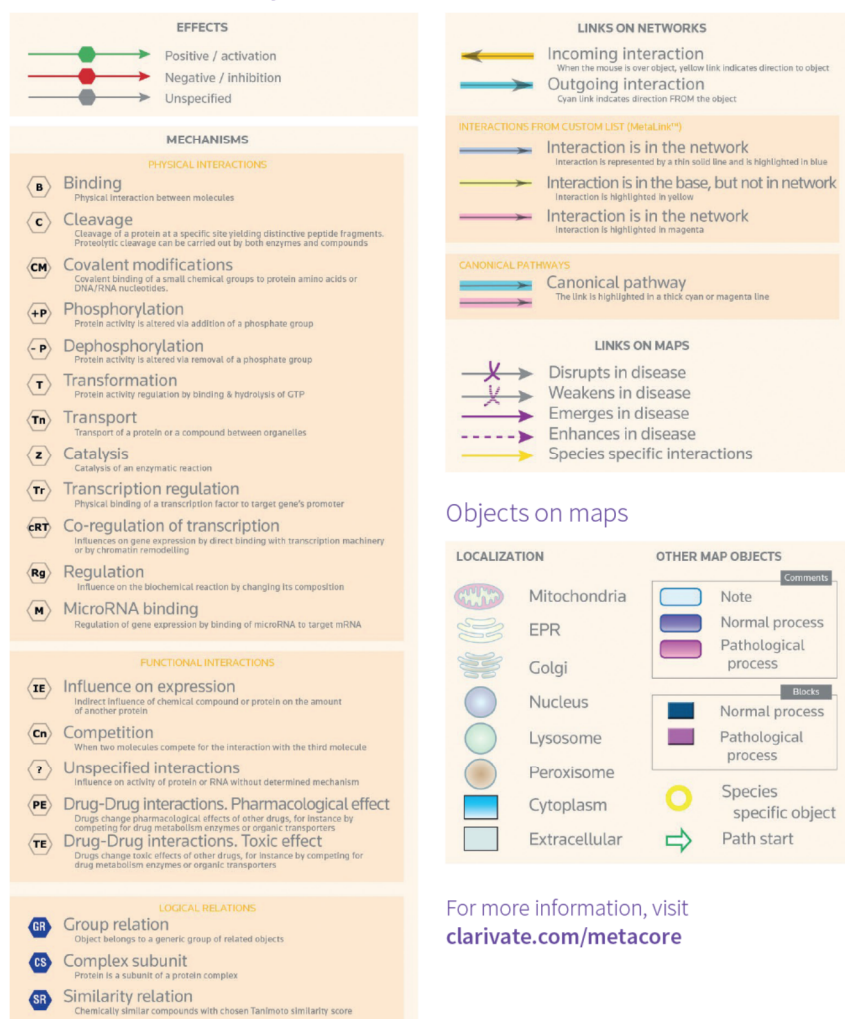

## Objects on maps

For more information, visit  
[clarivate.com/metacore](http://clarivate.com/metacore)

**North America**  
 Philadelphia: +1 800 336 4474  
 +1 215 386 0100

**Latin America**  
 Brazil: +55 11 8370 9845  
 Other countries: +1 215 823 5674

07.2017  
 © 2017 Clarivate Analytics

**Europe, Middle East and Africa**  
 London: +44 20 7433 4000

**Asia Pacific**  
 Singapore: +65 6775 5088  
 Tokyo: +81 3 5218 6500

[clarivate.com](http://clarivate.com)

**Cortellis**  
 Powering Life Sciences Innovation

**Clarivate**  
 Analytics

**Figure. S22** MetaCore™ “Quick reference guide” (Part 2).
